# Supplementary material for: Effect of chewing betel nut on the gut microbiota of Hainanese
Source: PLoS One. 2021 Oct 14;16(10):e0258489. doi: 10.1371/journal.pone.0258489 (PMC8516201; doi:10.1371/journal.pone.0258489)
Supplement: S4 Table — (XLSX) [file pone.0258489.s004.xlsx]

## Sheet: M
Table S4 Bacteria that changed significantly in the different age groups
	Youth (18-30 years old)								Middle age (31-45 years old)							Middle_elderly age (31-45 years old)
	MC mean	SD	MA mean	SD	p-value	q-value			MC mean	SD	MA mean	SD	p-value	q-value			MC mean	SD	MA mean	SD	p-value	q-value
phylum								phylum								phylum
								p__Firmicutes	0.63463	0.048063	0.806814	0.028491	0.003996	0.151575		p__Cyanobacteria	7e-05	4.3e-05	0.000685	0.000241	0.012987	0.103075
								p__Cyanobacteria	0.000111	7.9e-05	0.001079	0.000433	0.031968	0.606301		p__Euryarchaeota	0	0	2e-05	1.5e-05	0.021366	0.103075
family								family								family
f__Ananas_comosuspineapple	4.5e-05	2.7e-05	0.001494	0.000665	0.000999	0.321767		f__human_gut_metagenome	0	0	3.4e-05	3.4e-05	0.000409	0.08315		OTU	mean(group1)	stderr(group1)	mean(group2)	stderr(group2)	p-value	q-value
f__Mitochondria	5e-06	5e-06	3.3e-05	1.8e-05	0.010823	1		f__Ananas_comosuspineapple	9e-06	4e-06	0.000958	0.000433	0.000999	0.08315		f__Dermabacteraceae	5.5e-05	5.1e-05	0	0	0.000999	0.223956
f__Clostridium_methylpentosum_group	3.2e-05	1.4e-05	4e-06	4e-06	0.011277	1		f__Streptococcaceae	0.010079	0.001933	0.098361	0.033917	0.000999	0.08315		f__Clostridiaceae	0.006082	0.002874	0.021598	0.004578	0.00999	0.817028
f__Monoglobaceae	0.007603	0.001841	0.002033	0.000924	0.014985	1		f__uncultured_organism	0	0	0.000988	0.000955	0.000999	0.08315		f__Diplorickettsiaceae	0	0	2.3e-05	2.3e-05	0.011693	0.817028
f__Micrococcaceae	0.000137	4e-05	0.000758	0.000246	0.015984	1		f__Tannerellaceae	0.003276	0.000855	0.000659	0.000221	0.005994	0.389434		f__Brevibacteriaceae	1.8e-05	1.8e-05	0	0	0.015536	0.817028
f__Rhizobiaceae	0	0	1.5e-05	8e-06	0.03014	1		f__Eggerthellaceae	0.003928	0.000778	0.015478	0.004996	0.008991	0.389434		f__Methanobacteriaceae	0	0	2e-05	1.5e-05	0.021366	0.817028
f__Moraxellaceae	2.6e-05	2.6e-05	4e-06	4e-06	0.031732	1		f__Mitochondria	0	0	2e-05	8e-06	0.00927	0.389434		f__Ananas_comosuspineapple	6.7e-05	4.3e-05	0.000609	0.000246	0.025974	0.817028
f__Bacteroidaceae	0.022957	0.007433	0.007402	0.003751	0.043956	1		f__Aerococcaceae	2.3e-05	1.3e-05	0	0	0.009358	0.389434		f__Sphingomonadaceae	4e-06	4e-06	2.8e-05	1.2e-05	0.029156	0.817028
f__Anaerococcus	1.6e-05	1.1e-05	0	0	0.044632	1		f__Gemellaceae	0.000364	0.000249	1e-05	7e-06	0.011988	0.423309		f__Beijerinckiaceae	4e-06	4e-06	2.8e-05	2e-05	0.029156	0.817028
f__UCG-010	0.000465	0.00021	3.7e-05	2e-05	0.045954	1		f__Rikenellaceae	0.004465	0.001552	0.000696	0.000309	0.013986	0.423309		f__Rhodobacteraceae	0	0	9.1e-05	5.3e-05	0.038961	0.918218
f__Atopobiaceae	0.000333	0.000128	0.00112	0.000362	0.046953	1		f__Marinifilaceae	0.000995	0.000259	0.000168	0.000143	0.013986	0.423309		f__Selenomonadaceae	0.03447	0.020561	0.001212	0.000941	0.040959	0.918218
f__Butyricicoccaceae	0.012275	0.002713	0.005531	0.00154	0.046953	1		f__Lachnospiraceae	0.318724	0.027497	0.428742	0.038375	0.02997	0.831499		f__human_gut_metagenome	2.6e-05	2.6e-05	6e-06	6e-06	0.046716	0.952064
f__Marinifilaceae	0.000634	0.000262	0.000115	8.3e-05	0.047952	1		f__uncultured	0.000648	0.000507	2e-05	1e-05	0.03996	0.979458
								f__Dermabacteraceae	0	0	1.3e-05	1.3e-05	0.044129	0.979458
								f__Ruminiclostridium	0	0	1.3e-05	1.3e-05	0.044129	0.979458
genus								genus								genus
g__Scardovia	0	0	3.7e-05	2.9e-05	0.000999	0.222837		g__Synergistes	3.4e-05	3.4e-05	0	0	0.000724	0.129637		g__Prevotellaceae_NK3B31_group	0.000192	0.000184	0	0	0.000999	0.180416
g__Faecalicoccus	0	0	9.2e-05	8.8e-05	0.000999	0.222837		g__Candidatus_Stoquefichus	3.4e-05	2.8e-05	0	0	0.000724	0.129637		g__Pyramidobacter	0	0	6.8e-05	6.8e-05	0.000999	0.180416
g__Alloscardovia	0	0	0.000621	0.000512	0.000999	0.222837		g__Denitrobacterium	0	0	3e-05	2.4e-05	0.000892	0.129637		g__Anaerovibrio	6.7e-05	6.7e-05	0	0	0.000999	0.180416
g__Synergistes	3.4e-05	3.4e-05	0	0	0.001125	0.222837		g__Prevotellaceae_Ga6A1_group	0	0	0.002625	0.00257	0.000999	0.129637		g__Brachybacterium	5.5e-05	5.1e-05	0	0	0.000999	0.180416
g__Fusicatenibacter	0.019524	0.006001	0.004252	0.001414	0.007992	1		g__Clostridium_sensu_stricto_3	8e-05	8e-05	0	0	0.000999	0.129637		g__Lachnospiraceae_UCG-006	2.6e-05	2.6e-05	0	0	0.002937	0.30308
g__Elaeis_guineensisAfrican_oil_palm	5e-06	5e-06	3.3e-05	1.8e-05	0.010823	1		g__Alloscardovia	0	0	0.001607	0.001365	0.000999	0.129637		g__Fournierella	2.6e-05	2.6e-05	0	0	0.002937	0.30308
g__Candidatus_Stoquefichus	5e-06	5e-06	3.3e-05	3.3e-05	0.010823	1		g__Streptococcus	0.008518	0.001592	0.098347	0.033918	0.001998	0.172849		g__Actinobacillus	2.6e-05	1.9e-05	0	0	0.002937	0.30308
g__Lachnospiraceae_UCG-004	0.001666	0.000601	0.000111	3.8e-05	0.011988	1		g__Oscillospira	0.000111	5e-05	1e-05	5e-06	0.001998	0.172849		g__Alicycliphilus	0	0	2.8e-05	2.8e-05	0.006707	0.605619
g__Tuzzerella	2.4e-05	2.1e-05	0	0	0.012968	1		g__Odoribacter	0.000404	0.000124	1.7e-05	1e-05	0.001998	0.172849		g__Rickettsiella	0	0	2.3e-05	2.3e-05	0.011693	0.801666
g__Monoglobus	0.007603	0.001841	0.002033	0.000924	0.014985	1		g__Parabacteroides	0.003276	0.000855	0.000659	0.000221	0.003996	0.311128		g__Luteimonas	0	0	2.3e-05	1.8e-05	0.011693	0.801666
g__Kocuria	5e-06	5e-06	6.3e-05	2.6e-05	0.015984	1		g__NK4A214_group	0.005199	0.002059	0.000192	0.000103	0.004995	0.324091		g__Ruminococcus_gauvreauii_group	0.001268	0.000787	0.008526	0.003214	0.014985	0.801666
g__Catenibacterium	0	0	0.000137	0.000109	0.017982	1		g__Oscillibacter	0.000495	0.000167	7.1e-05	2.6e-05	0.004995	0.324091		g__Brevibacterium	1.8e-05	1.8e-05	0	0	0.015536	0.801666
g__Eubacterium_ventriosum_group	0.000705	0.000223	0.000126	6.6e-05	0.01998	1		g__Alistipes	0.004405	0.001558	0.000682	0.000305	0.006993	0.418826		g__Angelakisella	1.8e-05	1e-05	0	0	0.015536	0.801666
g__Rothia	0.000132	4e-05	0.000695	0.00024	0.01998	1		g__Elaeis_guineensisAfrican_oil_palm	0	0	2e-05	8e-06	0.00927	0.515539		g__F0332	1.8e-05	1e-05	0	0	0.015536	0.801666
g__DNF00809	2.1e-05	2.1e-05	0	0	0.02449	1		g__Gemella	0.000364	0.000249	1e-05	7e-06	0.00999	0.518546		g__Clostridium_sensu_stricto_1	0.006082	0.002874	0.021586	0.004579	0.016983	0.817887
g__Dielma	2.1e-05	1.4e-05	0	0	0.02449	1		g__Christensenella	0.000145	4.2e-05	2.4e-05	1.4e-05	0.011988	0.583364		g__Altererythrobacter	0	0	2e-05	1e-05	0.021366	0.9079
g__Anaerotruncus	7.9e-05	3e-05	7e-06	7e-06	0.02997	1		g__Pediococcus	2.8e-05	1.5e-05	3e-06	3e-06	0.014764	0.638628		g__Acetitomaculum	0	0	2e-05	2e-05	0.021366	0.9079
g__Shinella	0	0	1.5e-05	8e-06	0.03014	1		g__Dielma	2.8e-05	2e-05	3e-06	3e-06	0.014764	0.638628		g__Coprobacillus	7.8e-05	5.1e-05	3e-06	3e-06	0.023976	0.949559
g__Butyricicoccus	0.011757	0.002404	0.005509	0.001536	0.037962	1		g__metagenome	0.008711	0.003661	0.000998	0.000634	0.017982	0.715796		g__Raoultibacter	5.9e-05	2.6e-05	0.000324	0.000125	0.024975	0.949559
g__Butyricimonas	0.000436	0.000217	5.5e-05	2.7e-05	0.040959	1		g__Colidextribacter	0.000543	0.000189	9.4e-05	4.4e-05	0.018981	0.715796		g__Bosea	4e-06	4e-06	2.8e-05	2e-05	0.029156	1
g__Eubacterium_ruminantium_group	0.000396	0.000179	3.3e-05	2.4e-05	0.041958	1		g__Allisonella	0.000162	8.6e-05	0	0	0.01998	0.715796		g__Papillibacter	7e-06	7e-06	3.4e-05	1.7e-05	0.030674	1
g__Erysipelatoclostridium	8.2e-05	3.3e-05	0.001231	0.000943	0.042957	1		g__Acetitomaculum	0	0	1.7e-05	1.7e-05	0.020226	0.715796		g__Faecalicoccus	7e-06	7e-06	3.4e-05	2.1e-05	0.030674	1
g__Lachnospiraceae_UCG-008	0.000483	0.000186	0.000152	3.1e-05	0.042957	1		g__Mogibacterium	0.000259	0.000137	1e-05	7e-06	0.021978	0.744001		g__Paracoccus	0	0	9.1e-05	5.3e-05	0.031968	1
g__Lachnoclostridium	0.002937	0.000842	0.026495	0.015825	0.043956	1		g__Ruminococcus_gnavus_group	0.006533	0.004151	0.024231	0.006292	0.022977	0.74541		g__Lachnospira	0.006799	0.002293	0.00091	0.000304	0.033966	1
g__Providencia	1.8e-05	1.8e-05	0	0	0.04653	1		g__Anaerotruncus	6.3e-05	1.6e-05	1.7e-05	1e-05	0.023976	0.746706		g__Methanobrevibacter	0	0	1.7e-05	1.2e-05	0.03936	1
g__GCA-900066755	1.8e-05	1.1e-05	0	0	0.04653	1		g__DTU089	7.4e-05	2.7e-05	7e-06	7e-06	0.026973	0.807735		g__Pseudoxanthomonas	0	0	1.7e-05	1.7e-05	0.03936	1
								g__Lachnoclostridium	0.003956	0.001645	0.015327	0.004329	0.02997	0.864244
								g__Sutterella	0.00126	0.000737	5.7e-05	3.1e-05	0.031968	0.867183
								g__Lachnospiraceae_FCS020_group	0.001169	0.000292	0.000413	0.000148	0.032967	0.867183
								g__UCG-003	0.000768	0.000256	0.000171	0.000129	0.033966	0.867183
								g__Abiotrophia	1.7e-05	1.2e-05	0	0	0.034527	0.867183
								g__Lachnospiraceae_UCG-003	0	0	1.3e-05	1.3e-05	0.044129	1
								g__Brachybacterium	0	0	1.3e-05	1.3e-05	0.044129	1
								g__Actinobacillus	0	0	1.3e-05	1.3e-05	0.044129	1
								g__Shuttleworthia	2.3e-05	2e-05	3e-06	3e-06	0.044968	1
								g__Corynebacterium	3.1e-05	1.9e-05	7e-06	5e-06	0.046972	1
								g__Staphylococcus	6e-06	4e-06	0.000151	9.7e-05	0.047952	1
